# Supplementary material for: Modeling and LQR Control of Insect Sized Flapping Wing Robot
Source: Research Square preprint supplement (doi:10.21203/rs.3.rs-4669540/v1), 2024-07-29
Supplement: Supplementary file 1 [file eeb7e1c1482b10b328dee656.docx]

**Supplementary Material Index**

Supplementary files attached with the manuscript are indexed below:

Supplementary Video (.mp4) : The video shows the hardware experiment results. There are three maneuvers in the video hovering, disturbance rejection and circular trajectory tracking. Each maneuver is first played in real-time (1x) followed by a slow motion playback (0.1x).
Supplementary Data-hovering (.xls) : Trajectory data of the Robofly. The data consists of positions, quaternions, inputs and desired positions of the robot listed in time while performing a hovering maneuver.

Supplementary Data-disturbance_rejection (.xls) : Trajectory data of the Robofly. The data consists of positions, quaternions, inputs and desired positions of the robot listed in time while performing a hovering maneuver and rejecting the external disturbance applied to the Kevlar.

Supplementary Data-trajectory_tracking (.xls) : Trajectory data of the Robofly. The data consists of positions, quaternions, inputs and desired positions of the robot listed in time while performing a circular trajectory tracking maneuver.

Supplementary Data-Model_validation_traj1 (.xls) : Trajectory data of the 1st trajectory of the Robofly used for model validation. The data consists of positions, quaternions, inputs and desired positions of the robot listed in time.

Supplementary Data-Model_validation_traj2 (.xls) : Trajectory data of the 2nd trajectory of the Robofly used for model validation. The data consists of positions, quaternions, inputs and desired positions of the robot listed in time.

Supplementary Data-Model_validation_traj3 (.xls) : Trajectory data of the 3rd trajectory of the Robofly used for model validation. The data consists of positions, quaternions, inputs and desired positions of the robot listed in time.

Supplementary Data-Model_validation_traj4 (.xls) : Trajectory data of the 4th trajectory of the Robofly used for model validation. The data consists of positions, quaternions, inputs and desired positions of the robot listed in time.

Supplementary Data-Model_validation_traj5 (.xls) : Trajectory data of the 5th trajectory of the Robofly used for model validation. The data consists of positions, quaternions, inputs and desired positions of the robot listed in time.

Supplementary Data-Model_validation_traj6 (.xls) : Trajectory data of the 6th trajectory of the Robofly used for model validation. The data consists of positions, quaternions, inputs and desired positions of the robot listed in time.

Supplementary Data-Model_validation_traj7 (.xls) : Trajectory data of the 7th trajectory of the Robofly used for model validation. The data consists of positions, quaternions, inputs and desired positions of the robot listed in time.

Supplementary Data-Model_validation_traj8 (.xls) : Trajectory data of the 8th trajectory of the Robofly used for model validation. The data consists of positions, quaternions, inputs and desired positions of the robot listed in time.
